# Supplementary material for: New Epigenetic Modifier Inhibitors Enhance Microspore Embryogenesis in Bread Wheat
Source: MDPI journal article supplement (doi:10.3390/plants13060772), 2024-03-08
Supplement: s1 [file s1]

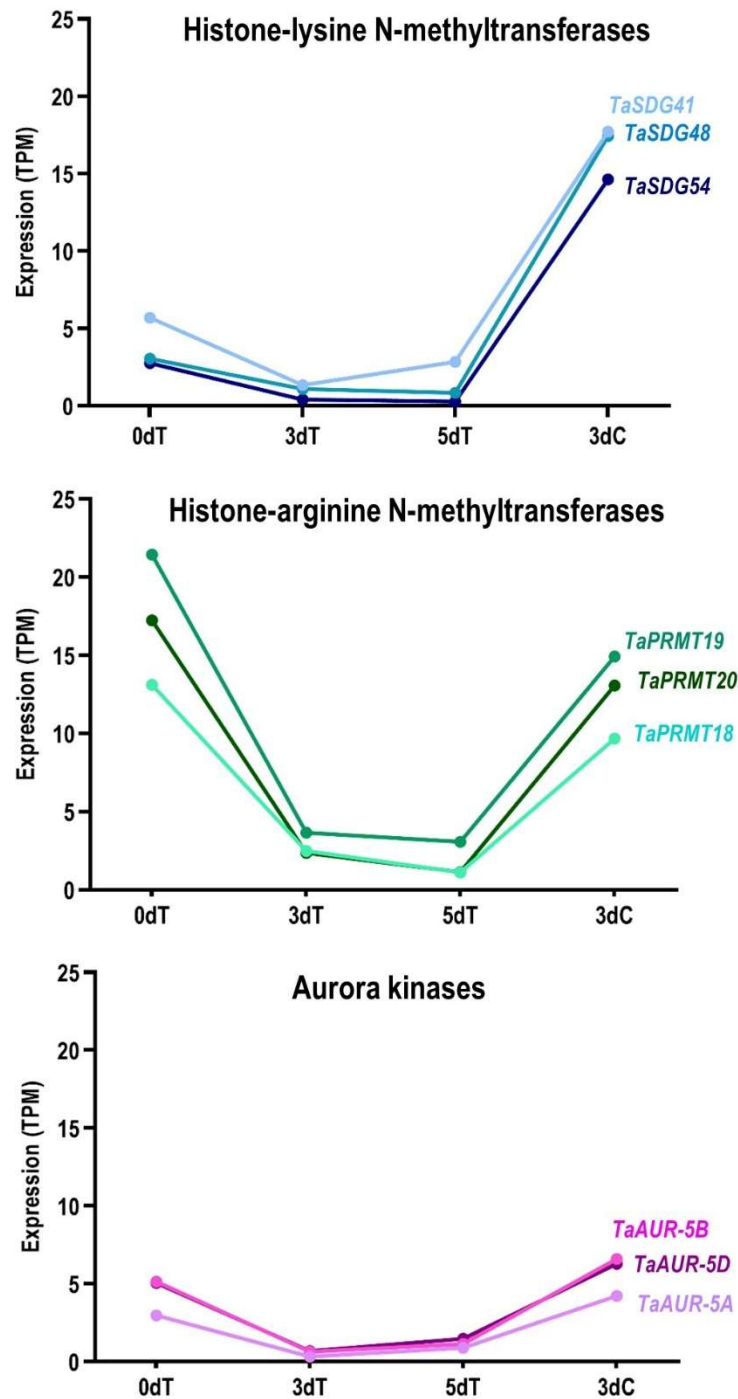

**Supplementary Figure S1:** Gene expression of wheat histone-lysine N-methyltransferases, histone-arginine N-methyltransferases and Aurora kinases before ME induction (0dT), after 3 or 5 days of stress treatment (3dT and 5dT) and after 3 days in culture (3dC) after ME induction. Data based in a wheat RNA-seq analysis (Valero-Rubira et al., unpublished data).

**Supplementary Table S1:** Percentages of microspores, bicellular structures, tricellular structures (both pollen-like structures or embryogenic structures), tetracellular and multicellular embryogenic structures after application of 0.4  $\mu$ M TSA (L-0.4TSA), Chaetocin (L-0.4Chaetocin), CARM1 inhibitor (L-0.4CARM1I), Aurora Kinase Inhibitor II (L-0.4AUKI-II) and Hesperadin (L-0.4Hesperadin), during a 24-hour stress treatment in SM liquid medium. **A)** after 2 days of culture (2dC); **B)** after 4 days of culture (4dC); **C)** after 10 days of culture (10dC) in Pavon wheat cultivar. L-CM= control in SM liquid medium; L-CM+DMSO= control DMSO in SM medium with 1 % DMSO. Values followed by the same letter within each treatment are not significantly different ( $p < 0.05$ ) according to a Chi square test.

| <b>A) Pavon 2dC (%)</b> | <b><u>Embryogenic structures</u></b> |                   |                    |                      |                      |
|-------------------------|--------------------------------------|-------------------|--------------------|----------------------|----------------------|
|                         | <b>Microspores</b>                   | <b>Bicellular</b> | <b>Tricellular</b> | <b>Tetracellular</b> | <b>Multicellular</b> |
| <b>L-CM</b>             | 41.0 a                               | 57.0 ab           | 2.0 a              | 0.0 a                | 0.0 a                |
| <b>L-CM+DMSO</b>        | 43.0 a                               | 53.6 bc           | 3.1 a              | 0.3a                 | 0.0 a                |
| <b>L-0.4TSA</b>         | 26.8 b                               | 68.9 a            | 4.1 a              | 0.24 a               | 0.0 a                |
| <b>L-0.4Chaetocin</b>   | 34.8 ab                              | 62.1 ab           | 2.9 a              | 0.2 a                | 0.0 a                |
| <b>L-0.4CARM1I</b>      | 34.7 ab                              | 60.77 ab          | 4.0 a              | 0.6 a                | 0.0 a                |
| <b>L-0.4AUKI- II</b>    | 36.1 ab                              | 59.3 ab           | 3.6 a              | 0.9 a                | 0.0 a                |
| <b>L-0.4Hesperadin</b>  | 35.8 ab                              | 60.1 ab           | 3.4 a              | 0.8 a                | 0.0 a                |

| <b>B) Pavon 4dC (%)</b> | <b><u>Tricellular structures</u></b> |                   |                    | <b><u>Embryogenic structures</u></b> |                      |                      |
|-------------------------|--------------------------------------|-------------------|--------------------|--------------------------------------|----------------------|----------------------|
|                         | <b>Microspores</b>                   | <b>Bicellular</b> | <b>Pollen-like</b> | <b>Embryogenic</b>                   | <b>Tetracellular</b> | <b>Multicellular</b> |
| <b>L-CM</b>             | 48.7 a                               | 48.5 a            | 2.7 a              | 0.0 b                                | 0.2 a                | 0.0 a                |
| <b>L-CM+DMSO</b>        | 46.3 ab                              | 48.4 a            | 2.1 a              | 3.2 ab                               | 0.0 a                | 0.0 a                |
| <b>L-0.4TSA</b>         | 35.1 ab                              | 56.8 a            | 3.4 a              | 3.4 ab                               | 1.0 a                | 0.3 a                |
| <b>L-0.4Chaetocin</b>   | 36.8 ab                              | 58.4 a            | 2.8 a              | 0.9 ab                               | 1.1 a                | 0.0 a                |
| <b>L-0.4CARM1I</b>      | 35.3 ab                              | 57.7 a            | 4.1 a              | 1.7 ab                               | 1.2 a                | 0.0 a                |
| <b>L-0.4AUKI- II</b>    | 33.5 b                               | 55.8 a            | 3.0 a              | 6.1 a                                | 1.4 a                | 0.3 a                |
| <b>L-0.4Hesperadin</b>  | 35.8 ab                              | 56.2 a            | 6.0 a              | 0.0 b                                | 2.0 a                | 0.0 a                |

| <b>C) Pavon 10dC (%)</b> | <b><u>Tricellular structures</u></b> |                   |                    | <b><u>Embryogenic structures</u></b> |                      |                      |
|--------------------------|--------------------------------------|-------------------|--------------------|--------------------------------------|----------------------|----------------------|
|                          | <b>Microspores</b>                   | <b>Bicellular</b> | <b>Pollen-like</b> | <b>Embryogenic</b>                   | <b>Tetracellular</b> | <b>Multicellular</b> |
| <b>L-CM</b>              | 57.2 a                               | 31.6 ab           | 2.2 ab             | 4.3 ab                               | 2.3 b                | 2.3 d                |
| <b>L-CM+DMSO</b>         | 43.6 ab                              | 29.9 b            | 0.0 b              | 8.8 a                                | 7.8 ab               | 9.8 bc               |
| <b>L-0.4TSA</b>          | 34.2 bc                              | 28.8 b            | 3.8 ab             | 11.3 a                               | 3.9 ab               | 18.1 ab              |
| <b>L-0.4Chaetocin</b>    | 25.0 c                               | 38.0 ab           | 5.0 a              | 9.9 a                                | 8.7 ab               | 13.5 ab              |
| <b>L-0.4CARM1I</b>       | 28.6 c                               | 32.0 ab           | 6.1 a              | 9.2 a                                | 10.3 a               | 13.8 ab              |
| <b>L-0.4AUKI- II</b>     | 24.8 c                               | 34.0 ab           | 0.0 b              | 11.7 a                               | 7.8 ab               | 21.8 a               |
| <b>L-0.4Hesperadin</b>   | 37.6 bc                              | 44.0 a            | 7.0 a              | 0.0 b                                | 6.9 ab               | 4.6 cd               |

**Supplementary Table S2:** Percentages of microspores, bicellular structures, tricellular structures (both pollen-like structures or embryogenic structures), tetracellular and multicellular embryogenic structures after application of 0.4  $\mu$ M of TSA (L-0.4TSA), Chaetocin (L-0.4Chaetocin), CARM1 inhibitor (L-0.4CARM1I), Aurora Kinase Inhibitor II (L-0.4AUKI-II) and Hesperadin (L-0.4Hesperadin), during a 24-hour stress treatment in SM liquid medium. **A)** after 2 days of culture (2dC); **B)** after 4 days of culture (4dC); **C)** after 10 days of culture (10dC) in Caramba wheat cultivar. L-CM = control in SM liquid medium; L-CM+DMSO= control DMSO in SM medium with 1 % DMSO. Values followed by the same letter within each treatment are not significantly different ( $p < 0.05$ ) according to a Chi square test.

|                           |                    | <u>Embryogenic structures</u> |                    |                      |                      |
|---------------------------|--------------------|-------------------------------|--------------------|----------------------|----------------------|
| <b>A) Caramba 2dC (%)</b> | <b>Microspores</b> | <b>Bicellular</b>             | <b>Tricellular</b> | <b>Tetracellular</b> | <b>Multicellular</b> |
| L-CM                      | 27.0 a             | 71.1 a                        | 1.7 a              | 0.2 a                | 0.0 a                |
| L-CM+DMSO                 | 23.1 a             | 74.2 a                        | 2.4 a              | 0.4 a                | 0.0 a                |
| L-0.4TSA                  | 210. a             | 75.4 a                        | 3.4 a              | 0.3 a                | 0.0 a                |
| L-0.4Chaetocin            | 31.2 a             | 63.0 a                        | 5.1 a              | 0.6 a                | 0.0 a                |
| L-0.4CARM1I               | 25.0 a             | 70.9 a                        | 4.1 a              | 0.0 a                | 0.0 a                |
| L-0.4AUKI- II             | 22.6 a             | 74.0 a                        | 3.4 a              | 0.0 a                | 0.0 a                |
| L-0.4Hesperadin           | 32.7 a             | 64.0 a                        | 3.1 a              | 0.3 a                | 0.0 a                |

|                           |                    | <u>Tricellular structures</u> |                    | <u>Embryogenic structures</u> |                      |                      |
|---------------------------|--------------------|-------------------------------|--------------------|-------------------------------|----------------------|----------------------|
| <b>B) Caramba 4dC (%)</b> | <b>Microspores</b> | <b>Bicellular</b>             | <b>Pollen-like</b> | <b>Embryogenic</b>            | <b>Tetracellular</b> | <b>Multicellular</b> |
| L-CM                      | 41.1 a             | 54.1 a                        | 4.5 c              | 0.0 a                         | 0.3 a                | 0.0 a                |
| L-CM+DMSO                 | 39.8 a             | 51.7 a                        | 6.7 bc             | 0.8 a                         | 1.1 a                | 0.0 a                |
| L-0.4TSA                  | 23.1 b             | 58.9 a                        | 16.1 a             | 0.0 a                         | 1.2 a                | 0.8 a                |
| L-0.4Chaetocin            | 36.5 ab            | 56.1 a                        | 4.5 c              | 2.3 a                         | 0.6 a                | 0.0 a                |
| L-0.4CARM1I               | 30.1 ab            | 55.9 a                        | 13.7 ab            | 0.0 a                         | 0.4 a                | 0.0 a                |
| L-0.4AUKI- II             | 32.4 ab            | 61.3 a                        | 3.0 c              | 3.0 a                         | 0.3 a                | 0.0 a                |
| L-0.4Hesperadin           | 29.9 ab            | 65.0 a                        | 5.1 c              | 0.0 a                         | 0.0 a                | 0.0 a                |

|                            |                    | <u>Tricellular structures</u> |                    | <u>Embryogenic structures</u> |                      |                      |
|----------------------------|--------------------|-------------------------------|--------------------|-------------------------------|----------------------|----------------------|
| <b>C) Caramba 10dC (%)</b> | <b>Microspores</b> | <b>Bicellular</b>             | <b>Pollen-like</b> | <b>Embryogenic</b>            | <b>Tetracellular</b> | <b>Multicellular</b> |
| L-CM                       | 40.9 a             | 40.0 ab                       | 0.0 c              | 14.6 ab                       | 1.8 b                | 2.7 ab               |
| L-CM+DMSO                  | 41.5 a             | 39.2 ab                       | 2.9 bc             | 8.7 bc                        | 4.6 ab               | 3.1 ab               |
| L-0.4TSA                   | 32.0 ab            | 49.2 a                        | 0.0 c              | 9.4 bc                        | 4.7 ab               | 4.7 ab               |
| L-0.4Chaetocin             | 40.7 a             | 30.2 b                        | 0.0 c              | 19.8 a                        | 8.1 a                | 1.2 ab               |
| L-0.4CARM1I                | 40.8 a             | 44.1 a                        | 9.9 b              | 3.3 cd                        | 2.0 b                | 0.0 b                |
| L-0.4AUKI- II              | 37.9 ab            | 36.7 ab                       | 0.0 c              | 11.2 ab                       | 8.7 a                | 5.6 a                |
| L-0.4Hesperadin            | 24.6 b             | 48.6 a                        | 20.3 a             | 0.0 d                         | 4.4 ab               | 2.2 ab               |

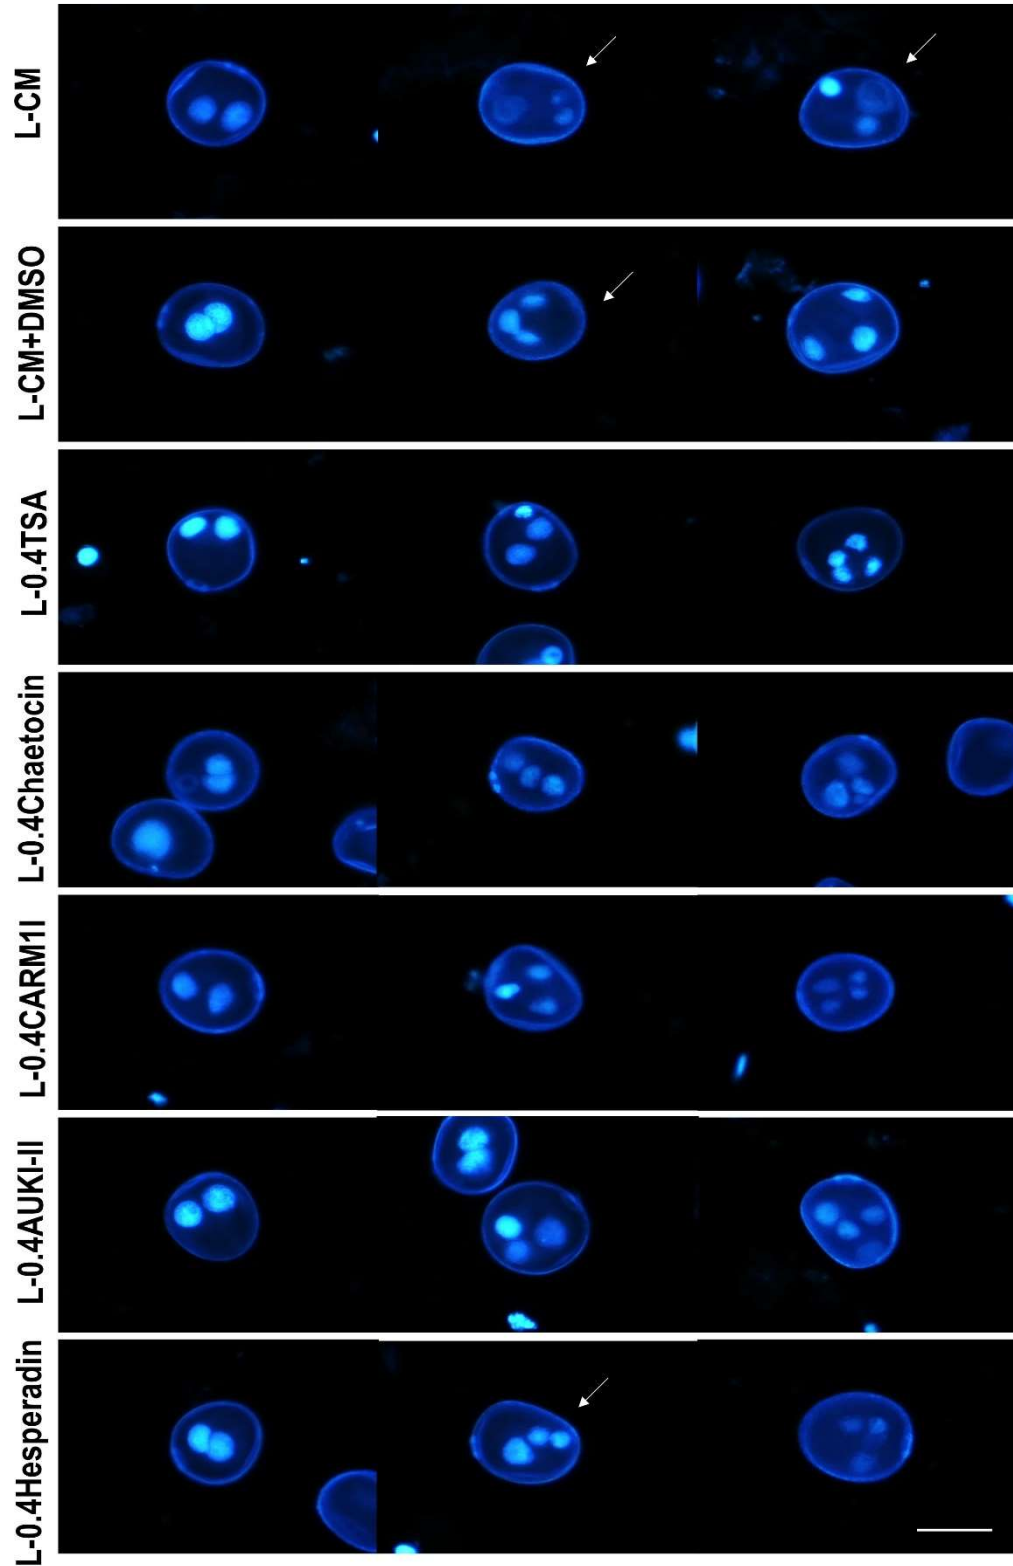

**Supplementary Figure S2:** DAPI staining of bicellular (both symmetric and asymmetric divisions), trichocellular (both pollen-like and embryogenic), and tetracellular embryogenic structures after a 24-hour treatment in SM liquid medium with 0.4  $\mu$ M TSA (L-0.4TSA), Chaetocin (L-0.4Chaetocin), a CARM1 inhibitor (L-0.4CARM1I), Aurora Kinase inhibitor II (L-0.4AUKI-II) and Hesperadin (L-0.4Hesperadin), in Pavon cultivar after 4 days in culture (4dC); L-CM = Control in SM liquid medium; L-CM+DMSO = Control DMSO in SM liquid medium with 1 % DMSO. White arrow: trichocellular pollen-like structure. Scale bar = 20  $\mu$ m.

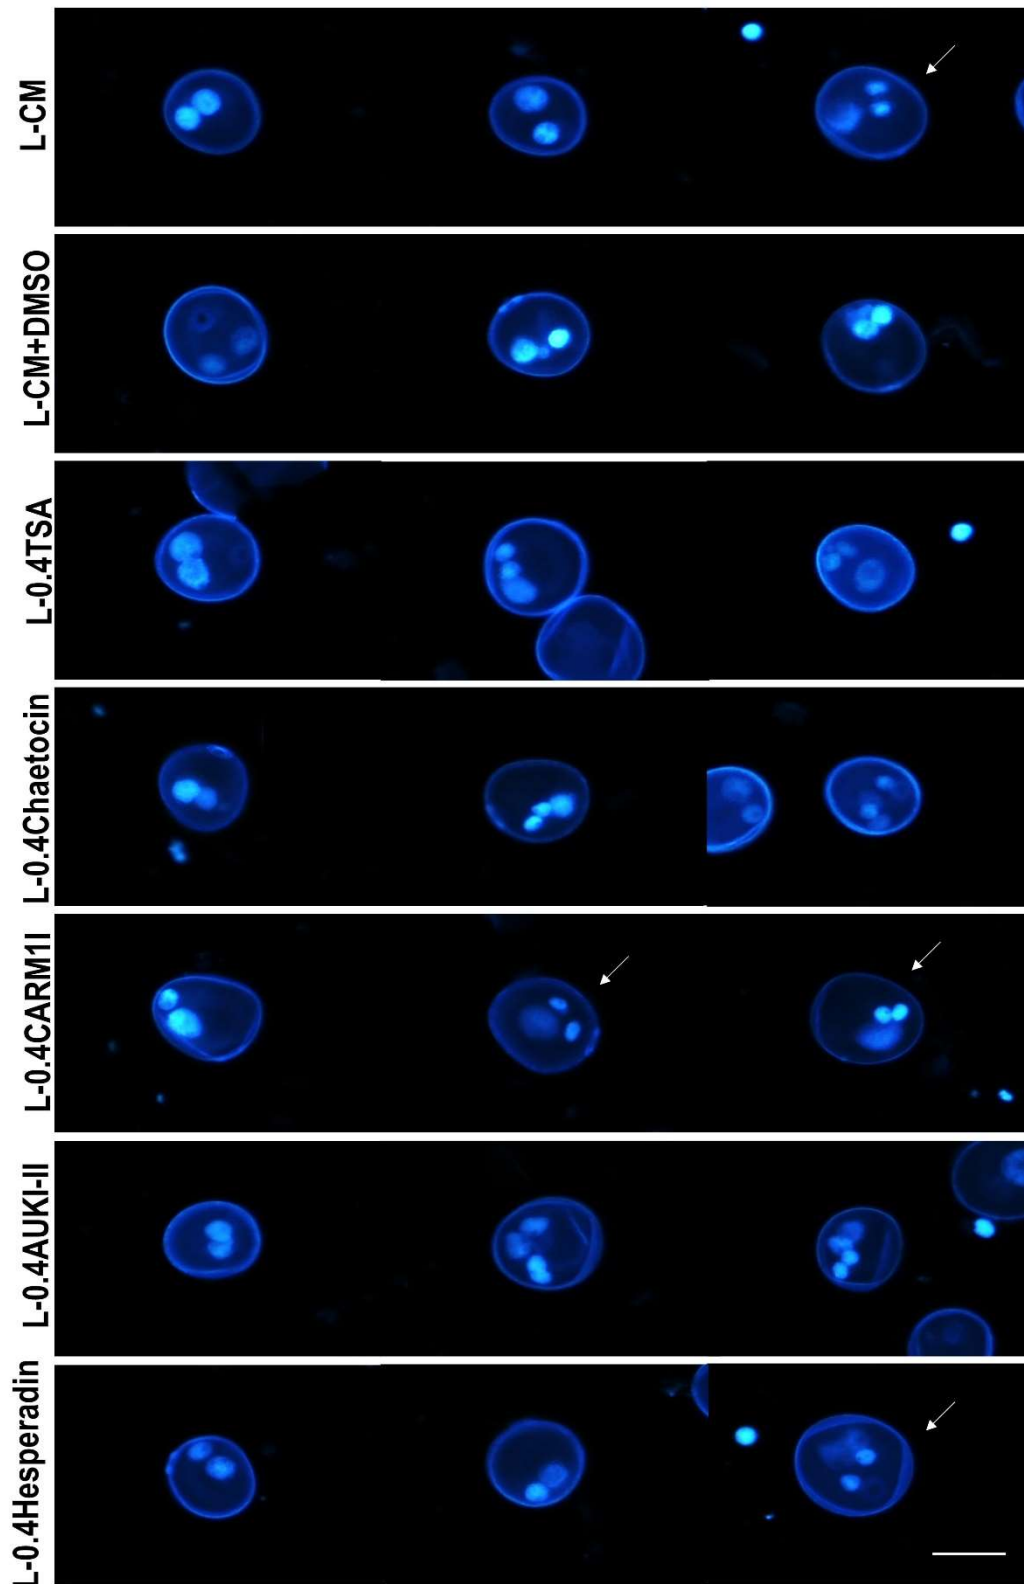

**Supplementary Figure S3:** DAPI staining of bicellular (both symmetric and asymmetric divisions), tricellular (both pollen-like and embryogenic) and tetracellular embryogenic structures after a 24-hour treatment in SM liquid medium with 0.4  $\mu$ M TSA (L-0.4TSA), Chaetocin (L-0.4Chaetocin), a CARM1 inhibitor (L-0.4CARM1I), Aurora Kinase inhibitor II (L-0.4AUKI-II) and Hesperadin (L-0.4Hesperadin), in Caramba cultivar after 4 days in culture (4dC); L-CM = Control in SM liquid medium; L-CM+DMSO = Control DMSO in SM liquid medium with 1 % DMSO. White arrow: tricellular pollen-like structure. Scale bar = 20  $\mu$ m.

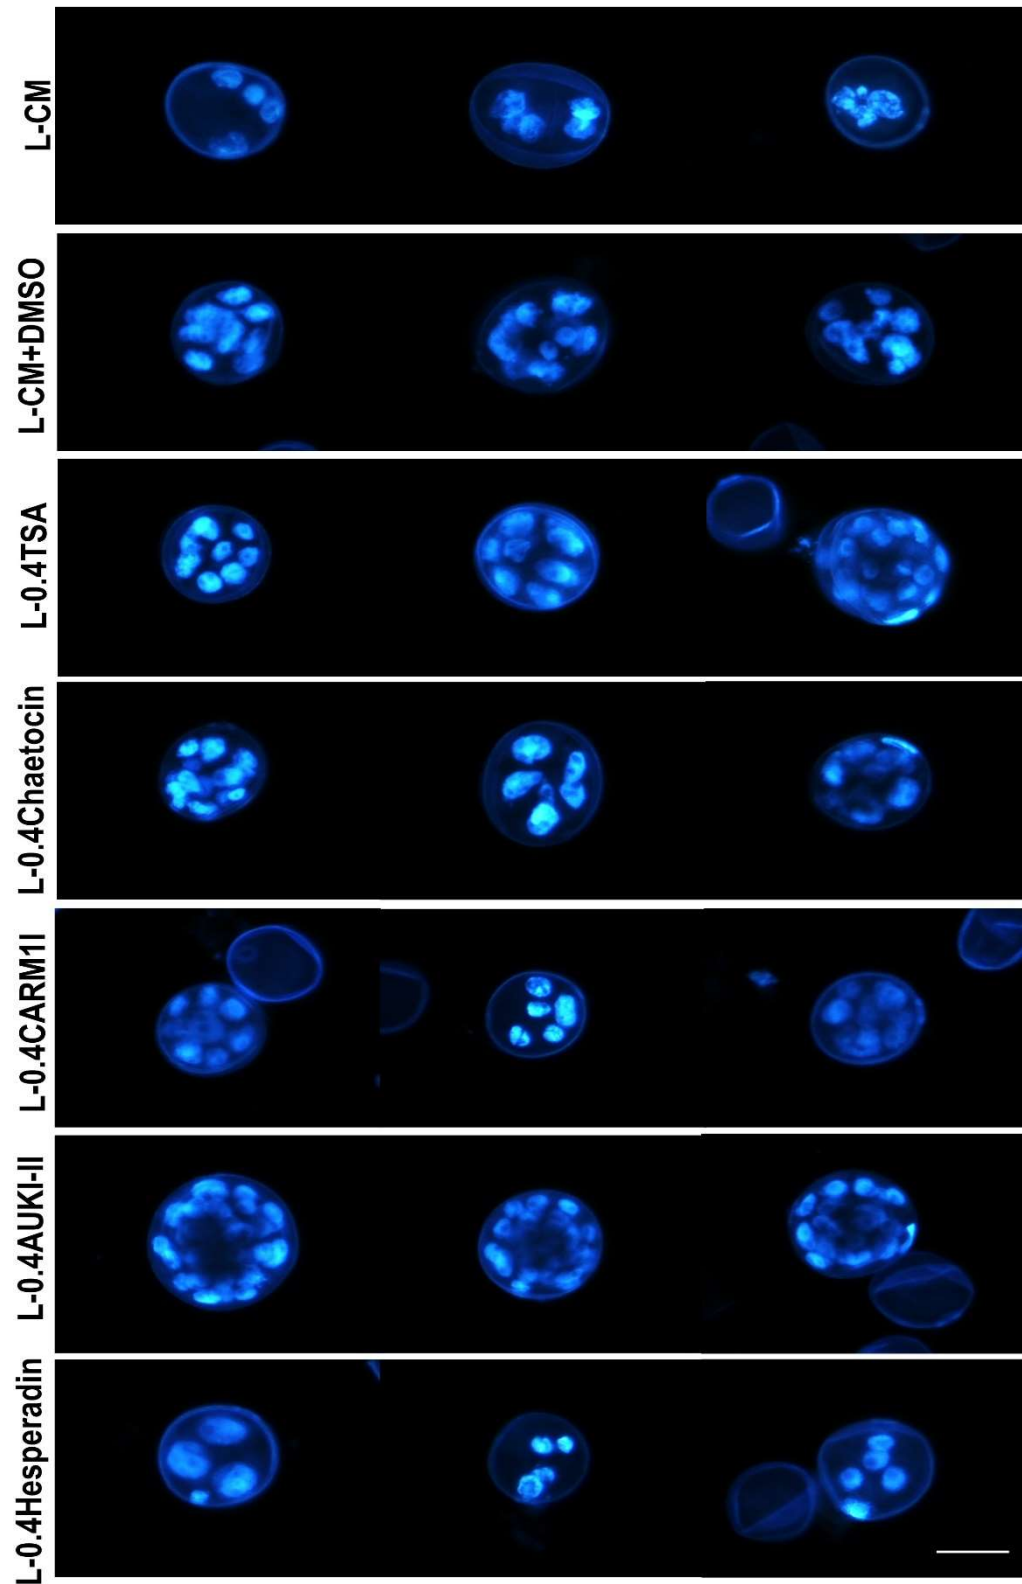

**Supplementary Figure S4:** DAPI staining of tetracellular and multicellular embryogenic structures after a 24-hour treatment in SM liquid medium with 0.4  $\mu$ M TSA (L-0.4TSA), Chaetocin (L-0.4Chaetocin), a CARM1 inhibitor (L-0.4CARM1I), Aurora Kinase inhibitor II (L-0.4AUKI-II) and Hesperadin (L-0.4Hesperadin), in Pavon cultivar after 10 days in culture (10dC); L-CM = Control in SM liquid medium; L-CM+DMSO = Control DMSO in SM liquid medium with 1 % DMSO. Scale bar = 20  $\mu$ m.

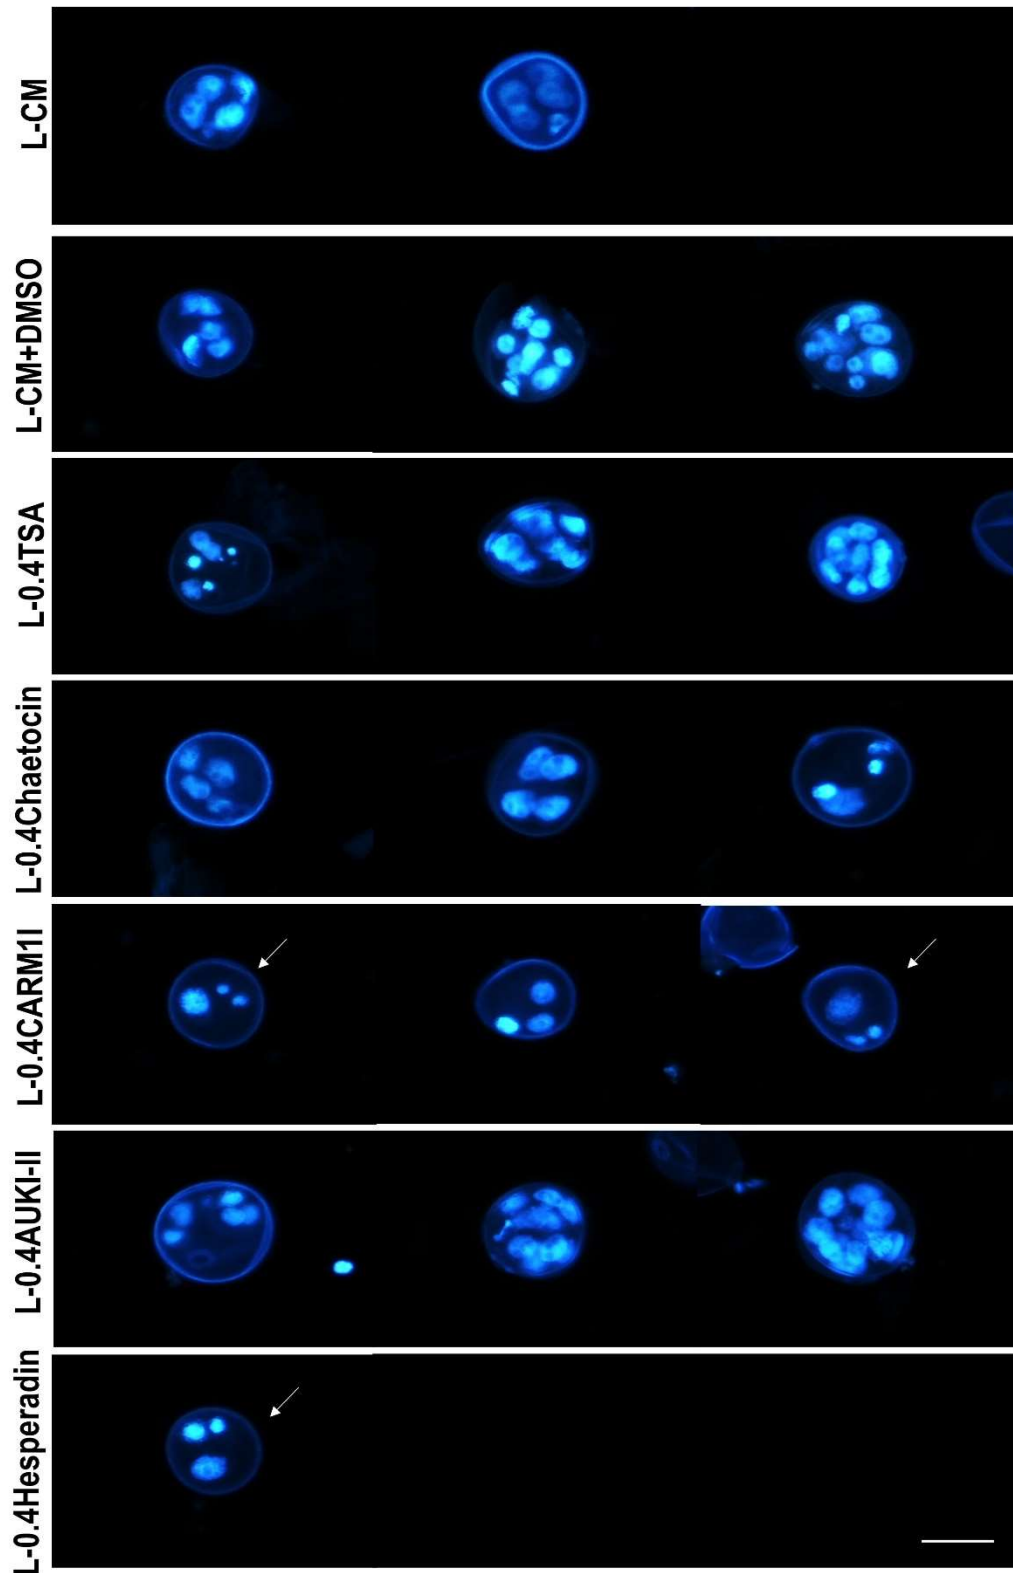

**Supplementary Figure S5.** DAPI staining of tricellular pollen-like, and tetracellular and multicellular embryogenic structures after a 24-hour treatment in SM liquid medium with 0.4  $\mu$ M TSA (L-0.4TSA), Chaetocin (L-0.4Chaetocin), a CARM1 inhibitor (L-0.4CARM1I), Aurora Kinase inhibitor II (L-0.4AUKI-II) and Hesperadin (L-0.4Hesperadin), in Caramba cultivar after 10 days in culture (10dC); L-CM = Control in SM liquid medium; L-CM+DMSO = Control DMSO in SM liquid medium with 1 % DMSO. White arrow: tricellular pollen-like structure. Scale bar = 20  $\mu$ m.
